# Supplementary figures and images for: Association Between Dietary Theobromine and Cognitive Function in a Representative Elderly American Population: A Cross-Sectional Study
Source: Research Square preprint supplement (doi:10.21203/rs.3.rs-125270/v1), 2020-12-11

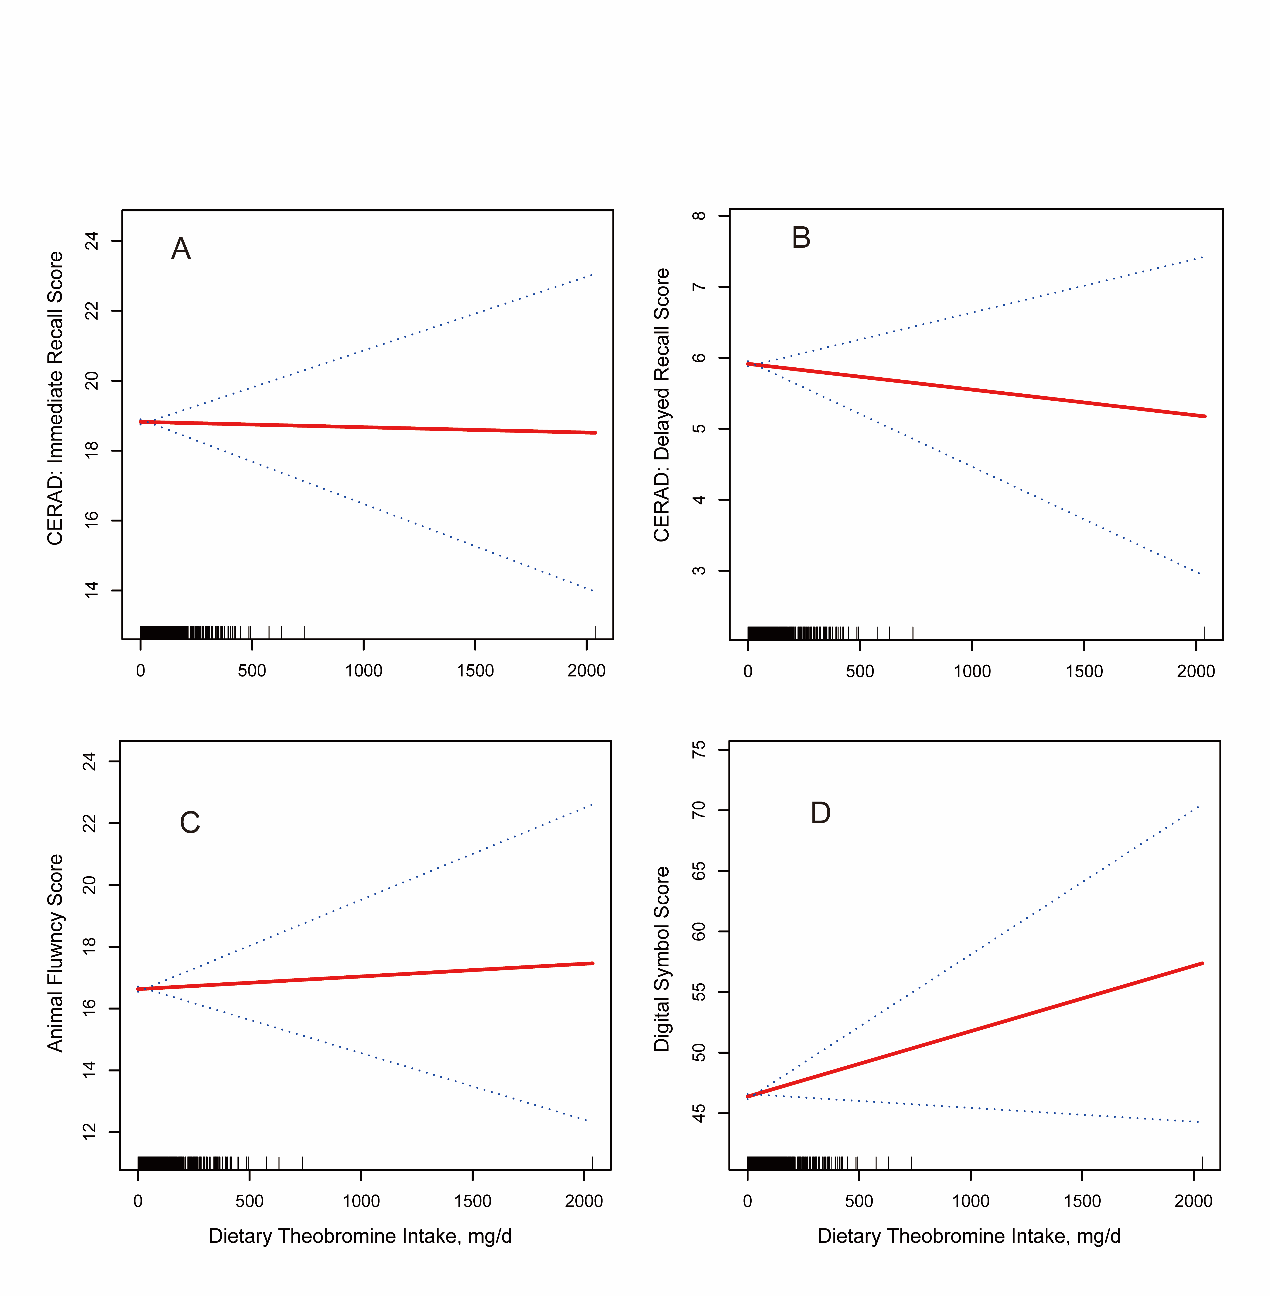

Supplement: Supplementary file 1 [file d7d0d4afb318727cd1570f7f.docx]
